# Supplementary material
Source: HighWire-hosted journal article supplement (https://bmjopen.bmj.com/content/14/8/e086388)
Supplement: inline-supplementary-material-4 [file inline-supplementary-material-4.pdf]

8/3/24, 9:40

Evaluation of Dynamic Arterial Elastance Efficacy and Safety during Vasopressor Support Weaning in Septic Shock Patients: A Random...

# Evaluation of Dynamic Arterial Elastance Efficacy and Safety during Vasopressor Support Weaning in Septic Shock Patients: A Randomized Controlled Trial Protocol: Case report form

Fundación Santa Fe de Bogotá, Department of Critical Medicine and Intensive Care

## 1. Identification of the patient in the study

---

## 2. Group assigned by randomization

*Mark only one oval.*

☐ EaDyn (intervention)

☐ MAP (control)

## 3. Inclusion criteria (check all those applying)

*Check all that apply.*

☐ Patient over 18 years old

☐ Septic shock patients defined according to the third international consensus of sepsis as patients who clinically present vasopressor support requirement to maintain a MAP  $\geq$  65 mmHg or a lactate level  $\geq$  2 mmol/L in the absence of hypovolemia

☐ SOFA score of  $\geq$  4 points

☐ Patients requiring vasopressor support for a period of 4 hours or more

8/3/24, 9:40

Evaluation of Dynamic Arterial Elastance Efficacy and Safety during Vasopressor Support Weaning in Septic Shock Patients: A Random...

4. Exclusion criteria (check all applicable)

Check all that apply.

- ☐ Pregnant women
- ☐ Hemodynamically unstable cardiac arrhythmias
- ☐ Treatment with another vasopressor other than noradrenaline or inotropic support requirement
- ☐ Patients with right heart failure
- ☐ Patients diagnosed with cirrhosis of the liver
- ☐ Patients who have received renal and/or hepatic transplantation
- ☐ Patients with a high probability of mortality in 24 hours defined according to medical criteria

5. Age (years)

6. Weight (Kg)

7. Diagnosis according to ICD-10

8/3/24, 9:40

Evaluation of Dynamic Arterial Elastance Efficacy and Safety during Vasopressor Support Weaning in Septic Shock Patients: A Random...

**8. Intensive inpatient care unit***Mark only one oval.*

- ☐ Surgical unit
- ☐ Neurological unit
- ☐ Sepsis / respiratory unit
- ☐ Cardiovascular
- ☐ Burn unit

**9. SOFA score at start of vasopressor support**

---

**10. Dose of noradrenaline at study inclusion (mcg/kg/min)**

---

**11. Total, noradrenaline infusion duration (hours)**

---

**12. Total, of noradrenaline administered (mg)**

---

**13. Total, of liquids administered (mL/kg/h)**

---

8/3/24, 9:40

Evaluation of Dynamic Arterial Elastance Efficacy and Safety during Vasopressor Support Weaning in Septic Shock Patients: A Random...

**14. Hypotension during weaning (MAP < 50 mmHg)***Mark only one oval.*☐ Yes☐ No**15. Death***Mark only one oval.*☐ Yes☐ No**16. Stay in ICU (time when the patient is without vasopressor and ventilatory support, days)**

---

**17. Stay in hospital (time at which doctor gives the order in the medical history of discharge, days)**

---

***Variables to be taken daily****DAY 1***18. Duration of NE (h)**

---

**19. Dose of NE (mg)**

---

8/3/24, 9:40

Evaluation of Dynamic Arterial Elastance Efficacy and Safety during Vasopressor Support Weaning in Septic Shock Patients: A Random...

20.

Administered liquids (mL)

21.

Diuresis (mL)

22.

Balance of liquids (mL)

23.

Blood products

Variables to be taken daily

DAY 2

24.

Duration of NE (h)

25.

Dose of NE (mg)

26.

Administered liquids (mL)

27.

Diuresis (mL)

8/3/24, 9:40

Evaluation of Dynamic Arterial Elastance Efficacy and Safety during Vasopressor Support Weaning in Septic Shock Patients: A Random...

28.

Balance of liquids (mL)

29.

Blood products

Variables to be taken daily

DAY 3

30.

Duration of NE (h)

31.

Dose of NE (mg)

32.

Administered liquids (mL)

33.

Diuresis (mL)

34.

Balance of liquids (mL)

35.

Blood products

8/3/24, 9:40

Evaluation of Dynamic Arterial Elastance Efficacy and Safety during Vasopressor Support Weaning in Septic Shock Patients: A Random...

**Variables to be taken daily**

DAY 4

36. Duration of NE (h)

37. Dose of NE (mg)

38. Administered liquids (mL)

39. Diuresis (mL)

40. Balance of liquids (mL)

41. Blood products

**Variables to be taken daily**

DAY 5

8/3/24, 9:40

Evaluation of Dynamic Arterial Elastance Efficacy and Safety during Vasopressor Support Weaning in Septic Shock Patients: A Random...

42.   **Duration of NE (h)**

43.   **Dose of NE (mg)**

44.   **Administered liquids (mL)**

45.   **Diuresis (mL)**

46.   **Balance of liquids (mL)**

47.   **Blood products**

***Variables to be taken daily***

DAY 6

48.   **Duration of NE (h)**

49.   **Dose of NE (mg)**



8/3/24, 9:40

Evaluation of Dynamic Arterial Elastance Efficacy and Safety during Vasopressor Support Weaning in Septic Shock Patients: A Random...

50.

Administered liquids (mL)

51.

Diuresis (mL)

52.

Balance of liquids (mL)

53.

Blood products

Variables to be taken daily

DAY 7

54.

Duration of NE (h)

55.

Dose of NE (mg)

56.

Administered liquids (mL)

57.

Diuresis (mL)

8/3/24, 9:40      Evaluation of Dynamic Arterial Elastance Efficacy and Safety during Vasopressor Support Weaning in Septic Shock Patients: A Random...

58.    **Balance of liquids (mL)**

---

59.    **Blood products**

---

***Variables to be taken daily***

DAY 8

60.    **Duration of NE (h)**

---

61.    **Dose of NE (mg)**

---

62.    **Administered liquids (mL)**

---

63.    **Diuresis (mL)**

---

64.    **Balance of liquids (mL)**

---

65.    **Blood products**

---

8/3/24, 9:40

Evaluation of Dynamic Arterial Elastance Efficacy and Safety during Vasopressor Support Weaning in Septic Shock Patients: A Random...

**Variables to be taken daily**

DAY 9

66. **Duration of NE (h)**

67. **Dose of NE (mg)**

68. **Administered liquids (mL)**

69. **Diuresis (mL)**

70. **Balance of liquids (mL)**

71. **Blood products**

**Variables to be taken daily**

DAY 10

8/3/24, 9:40

Evaluation of Dynamic Arterial Elastance Efficacy and Safety during Vasopressor Support Weaning in Septic Shock Patients: A Random...

72. **Duration of NE (h)**

---

73. **Dose of NE (mg)**

---

74. **Administered liquids (mL)**

---

75. **Diuresis (mL)**

---

76. **Balance of liquids (mL)**

---

77. **Blood products***Mark only one oval.*☐ Yes☐ No***Variables that change in the three points of measurment****At the beginning of administration of Noradrenaline*78. **SOFA score**

---

8/3/24, 9:40

Evaluation of Dynamic Arterial Elastance Efficacy and Safety during Vasopressor Support Weaning in Septic Shock Patients: A Random...

79. **Heart rate**

---

80. **MAP**

---

81. **Central venous pressure**

---

82. **Cardiac index (CI)**

---

83. **Saline solution administered (mL)**

---

84. **Albumin (mL)**

---

85. **Blood products***Mark only one oval.*☐ Yes☐ No86. **Albumin (mL)**

---

8/3/24, 9:40

Evaluation of Dynamic Arterial Elastance Efficacy and Safety during Vasopressor Support Weaning in Septic Shock Patients: A Random...

87.

Dose of noradrenaline (mg)

88.

Lactate (mmol/L)

89.

Venous saturation

90.

Diuresis (mL)

***Variables that change in the three points of measurment***

*At the beginning of the weaning of vasopressor support*

91.

SOFA score

92.

Heart rate

93.

MAP

94.

Central venous pressure

8/3/24, 9:40

Evaluation of Dynamic Arterial Elastance Efficacy and Safety during Vasopressor Support Weaning in Septic Shock Patients: A Random...

95. **Cardiac index (CI)**

---

96. **Saline solution administered (mL)**

---

97. **Albumin (mL)**

---

98. **Blood products***Mark only one oval.*☐ Yes☐ No99. **Albumin (mL)**

---

100. **Dose of noradrenaline (mg)**

---

101. **Lactate (mmol/L)**

---

102. **Venous saturation**

---

8/3/24, 9:40

Evaluation of Dynamic Arterial Elastance Efficacy and Safety during Vasopressor Support Weaning in Septic Shock Patients: A Random...

103.

Diuresis (mL)

***Variables that change in the three points of measurment***

*At the end of weaning vasopressor support*

104.

SOFA score

105.

Heart rate

106.

MAP

107.

Central venous pressure

108.

Cardiac index (CI)

109.

Saline solution administered (mL)

110.

Albumin (mL)



8/3/24, 9:40

Evaluation of Dynamic Arterial Elastance Efficacy and Safety during Vasopressor Support Weaning in Septic Shock Patients: A Random...

111. **Blood products**

Mark only one oval.

- ☐ Yes
- ☐ No

112. **Albumin (mL)**

113. **Dose of noradrenaline (mg)**

114. **Lactate (mmol/L)**

115. **Venous saturation**

116. **Diuresis (mL)**

This content is neither created nor endorsed by Google.

Google Forms
